# 1 Clair: Exploring the limit of using a deep 2 neural network on pileup data for 3 germline variant calling

4  
5 Ruibang Luo, Chak-Lim Wong, Yat-Sing Wong, Chi-Ian Tang, Chi-Man Liu, Chi-Ming Leung,  
6 Tak-Wah Lam

7  
8 Department of Computer Science, The University of Hong Kong, Hong Kong, China

9  
10 Correspondence and requests for materials should be addressed to R. L. (email:  
11 [rbluo@cs.hku.hk](mailto:rbluo@cs.hku.hk)) and T. L. ([twlam@cs.hku.hk](mailto:twlam@cs.hku.hk))

## 12 13 Abstract

14 Single-molecule sequencing technologies have emerged in recent years and revolutionized  
15 structural variant calling, complex genome assembly, and epigenetic mark detection.  
16 However, the lack of a highly accurate small variant caller has limited the new technologies  
17 from being more widely used. In this study, we present Clair, the successor to Clairvoyante,  
18 a program for fast and accurate germline small variant calling, using single molecule  
19 sequencing data. For ONT data, Clair achieves the best precision, recall and speed as  
20 compared to several competing programs, including Clairvoyante, Longshot and Medaka.  
21 Through studying the missed variants and benchmarking intentionally overfitted models, we  
22 found that Clair may be approaching the limit of possible accuracy for germline small variant  
23 calling using pileup data and deep neural networks. Clair requires only a conventional CPU  
24 for variant calling and is an open source project available at [https://github.com/HKU-](https://github.com/HKU-BAL/Clair)  
25 [BAL/Clair](https://github.com/HKU-BAL/Clair).

## 26 Introduction

27 Fast and accurate variant calling is essential for both research and clinical applications of  
28 human genome sequencing<sup>1,2</sup>. Algorithms, best practices and benchmarking guidelines have  
29 been established for how to use Illumina sequencing to call germline small variants,  
30 including single-nucleotide polymorphisms (SNPs) and insertions/deletions (indels)<sup>3-6</sup>. In  
31 recent years, single-molecule sequencing (SMS) technologies have emerged for a variety of  
32 important applications<sup>7</sup>. These technologies, which are also known as the third-generation  
33 sequencing technologies, generate sequencing reads two to three orders of magnitude  
34 longer than Illumina reads (10–100kbp versus 100–250bp). The long read length has made  
35 the new SMS technologies, including Pacific Biosciences (PacBio) and Oxford Nanopore  
36 Technology (ONT), unprecedentedly powerful for resolving complex genome assembly  
37 problems and for detecting large structural variants<sup>8</sup>. However, currently available SMS  
38 technologies also have a significantly higher base error rate of 3–15%<sup>9</sup>, making the variant  
39 calling methods previously designed for Illumina sequencing inapplicable to SMS  
40 technologies. The lack of accurate tools for efficient variant calling has limited SMS  
41 technologies from being applied to the many problems that require SNPs and small indels.

42

43 In our previous work, we developed Clairvoyante<sup>10</sup>, a germline small variant caller for single  
44 molecule sequencing data. Clairvoyante does not require sequence assembly and calls  
45 variants directly from read alignments. Clairvoyante adopts a deep convolutional neural  
46 network, so that by using the truth variants called and orthogonally verified in seven human  
47 individuals by the Genome In A Bottle (GIAB) consortium<sup>11-13</sup>, Clairvoyante can be trained  
48 for variant calling on any new type of sequencing data without the need to look into its  
49 error profile and build a hand-crafted model. Clairvoyante takes pileup data as input and  
50 runs quickly. However, Clairvoyante's design is unable to call multiallelic variants or indels  
51 longer than four bases. These defects remain to be solved. Meanwhile, the limit of using  
52 pileup data and deep neural networks for variant calling remains to be explored.

53

54 In this study, we present Clair, a fast and accurate system for germline small variant calling  
55 using single molecule sequencing data. With an entirely different network architecture and  
56 learning tasks (i.e. output components), Clair resolves the multiallelic and long indel variant  
57 calling problems that have prevented Clairvoyante from calling all types of small variants.  
58 We describe in detail the methods we tried that either worked or did not work for  
59 improving Clair's performance. For ONT datasets<sup>14</sup>, our experiments on whole-genome  
60 variant calling in GIAB samples show that Clair outperforms Clairvoyante and other variant  
61 callers, including Longshot<sup>15</sup> and Medaka<sup>16</sup>, in terms of precision, recall and speed. For high  
62 accuracy reads, including both PacBio CCS (Circular Consensus Sequencing)<sup>17</sup> and Illumina  
63 datasets<sup>13</sup>, DeepVariant<sup>18</sup> had modestly improved F1-scores over Clair by .11% to .12%,  
64 although Clair was seven times faster. Looking into the false positive (FP) and false negative  
65 (FN) variants of the three sequencing technologies showed that except for variants with  
66 insufficient coverage by chance, most of the others could be resolved using complete read  
67 alignments instead of pileup data or else could not be resolved at all, even with a manual  
68 inspection.

## 69 Results

### 70 Overview of Clair

71 Clair is a four-task, five-layer recurrent neural network with two bi-directional LSTM layers  
72 followed by three feedforward layers (**Figure 1**). Clair takes a BAM file as input to find  
73 candidate variants with any minor allele frequencies larger than a threshold (typically  
74 between 0.1 and 0.2), and then computes a pileup of the candidates and converts the  
75 summaries into a tensor. In a tensor, the allelic counts of bases and gaps on both strands of  
76 a candidate variant and its 16 flanking bases are encoded into 1,056 integer values. More  
77 details and pseudo code are available in the Methods section. As discussed in the  
78 Clairvoyante paper, one major unsolved problem was how to support the calling of multi-  
79 allelic variants (i.e., variants with two alternative alleles). In Clair, the problem is solved by  
80 using four new (deep learning) tasks that are entirely different from Clairvoyante. These are:  
81 1) a 21-genotype probabilistic model with 21 probability outputs; 2) the use of three  
82 probabilities for the input, including a homozygous reference (0/0 genotype), a  
83 heterozygous variant (0/1) or a homozygous variant (1/1); 3) the length of the first indel  
84 allele, with 33 probabilities representing a length of '<-15bp', '-15bp', '-14bp', ..., '-1bp',  
85 '0bp', '1bp', ..., '15bp', '>15bp'; and 4) the length of the second indel allele. The 21-genotype  
86 probabilistic model can represent all possible genotypes of a diploid sample at the genome  
87 position. The length of indels longer than 15bp cannot be directly inferred from the third

88 and fourth tasks, so Clair includes an additional step that re-scans the alignments. More  
89 details on each of these steps can be found in the Methods section. The four tasks make  
90 their own decisions and are designed to cross-validate each other. For example, task two is  
91 a coarse-grained version of task one and can veto the decision made by task one. Tasks  
92 three and four should indicate 0bp indel length if an SNP variant is decided by task one.  
93 More details on how the four tasks make a joint decision are available in the Methods  
94 section. We used the 'focal loss' deep-learning technique to solve the problem of  
95 unbalanced variant types in training data. We used the 'cyclical learning rate' deep learning  
96 technique to achieve the maximum possible variant calling performance and speed up the  
97 training process to be able to handle larger training datasets. To improve Clair's  
98 performance at lower sequencing coverages, we augmented the training data with 10  
99 subsampled coverages of each dataset. The parameters of these three new techniques are  
100 in the Methods section.

101

102 Clair has 2,377,818 parameters, which is 45.7% more than Clairvoyante (1,631,496  
103 parameters) but only one tenth as many as DeepVariant (23,885,392 parameters). In terms  
104 of variant calling speed, Clair takes about 30 minutes, 1.5 hour, and 5 hours for a 50-fold  
105 coverage WGS sample using Illumina, PacBio CCS and ONT data, respectively, using 24 CPU  
106 cores. In our experiments, Clair was 10–20% slower than Clairvoyante, but significantly  
107 faster than DeepVariant, Longshot and Medaka.

108

109 The Methods section includes a description of procedures to augment the training data or  
110 improve Clair's network architecture that we tested but that did not improve precision and  
111 recall of variant calling. Developers working on further improving Clair's performance can  
112 save time by avoiding the same methods, or the same settings in a method.

113

#### 114 [Performance on ONT](#)

115 ONT datasets are currently available for two GIAB samples, HG001 and HG002. The HG001  
116 rel6 dataset generated by the Nanopore WGS Consortium<sup>14</sup> contains approximately 44.3-  
117 fold coverage of human genome (the dataset is also referred to as 1:44x, where '1' means  
118 the sample suffix and '44x' means the coverage). The rel6 dataset was base-called with  
119 Guppy 2.3.8, using the HAC (High-ACcuracy) model. In addition to the rel6 dataset, we  
120 obtained a separate 124.1-fold coverage dataset for HG001 (1:124x) directly from Oxford  
121 Nanopore (Philipp Rescheneder, personal communication). That dataset was base-called  
122 with Guppy 2.2.3 using the Flip-Flop model. In some experiments, we combined 1:44x and  
123 1:124x to form a new dataset 1:168x to maximize the coverage. For HG002, we used a  
124 dataset with ~64-fold coverage (2:64x) from the GIAB consortium, which was base-called  
125 with Guppy 2.3.5 using the Flip-Flop model. The links to the datasets are available in the  
126 Supplementary Notes. The details about "the GIAB truth variant datasets", "removing  
127 GA4GH (The Global Alliance for Genomics and Health) low-complexity regions<sup>6</sup> from  
128 benchmarking", and "the benchmarking methods and metrics" are available in "Methods –  
129 Benchmarking".

130

131 **Figure 2** shows the precision and recall of Clair and other variant callers on SNPs and indels  
132 in multiple experiments with ONT data. Supplementary Table 1 contains more details,  
133 including precision, recall and F1-score in five categories, including overall, SNP, indel,  
134 insertion, and deletion. Our results show that Clair not only outperformed other variant

135 callers, including Clairvoyante, Longshot, and Medaka, but also ran much faster. Using  
136 1:168x|2:64x (i.e., test variant calling using HG002 with 64-fold coverage against a model  
137 trained using HG001 with 168-fold coverage) as Clair's primary result, Clair achieved 98.36%  
138 precision, 96.46% recall, and 97.40% F1-score overall performance. In terms of SNPs, the  
139 three metrics were 99.29%, 97.78% and 98.53%, respectively. For indels, they were  
140 somewhat lower at 81.15%, 73.88%, and 77.34%. Clair significantly outperformed its  
141 predecessor Clairvoyante on both SNP and indel calling (overall F1-score 97.40% versus  
142 93.45%). Clair had a slightly higher F1-score on SNPs than Longshot (98.53% versus 98.41%),  
143 but Longshot detects only SNPs, and Clair ran five times faster than Longshot (320 versus  
144 1,797 minutes). Clair had a better performance than Medaka (overall F1-score 97.40%  
145 versus 94.81%) and ran 30 times faster (320 versus 10,817 minutes). It is worth mentioning  
146 that we didn't benchmark Nanopolish<sup>19</sup>, which is also capable of variant calling on ONT data,  
147 because it also requires raw signals as input, which are not publicly available for HG002.  
148

149 We ran further experiments to answer five additional questions about Clair, as follows.  
150

151 **Is the Clair model reference-genome specific?** In our experiments, performance did not  
152 depend on whether we used GRCh37 or GRCh38. The performance of 1:168x|2:64x and  
153 1:168x|2:64x(b37) was similar; the latter experiment tested HG002 GRCh37 read alignments  
154 on a model trained using HG001 GRCh38 read alignments. Actually, 1:168x|2:64x(b37)  
155 performed slightly better than 1:168x|2:64x, with a 0.18% better F1-score on SNPs, and  
156 1.4% on indels.  
157

158 **Does higher coverage in the test sample helps improve variant calling performance?** Yes,  
159 but improvement seems to asymptote at ~60-fold coverage. In a comparison of  
160 1:168x|2:64x to 1:168x|2:32x, the overall F1-score increased from 94.10% to 97.40%  
161 (+3.30%), the SNP from 95.51% to 98.53% (+3.02%), and the indel from 68.87% to 77.34%  
162 (+8.47%). Further increasing the coverage in the test sample will not significantly increase  
163 the variant calling performance as we discuss below.  
164

165 **Does higher coverage for model training help improve variant calling performance?** Yes,  
166 but it depends on the coverage of the test sample. In a comparison of 1:124x|2:64x to  
167 1:44x|2:64x, the overall F1-score increased from 96.84% to 97.51% (+0.67%), the SNP from  
168 98.01% to 98.54% (+0.53%), and the indel from 75.78% to 78.44% (+2.66%). In a comparison  
169 of 1:168x|2:64x to 1:124x|2:64x, the performance was similar, or even slightly dropped  
170 from 97.51% to 97.40% overall. One possible reason is that the lower coverage test sample  
171 cannot benefit from the much higher coverage used for model training. We propose how to  
172 deal with excessively high coverage in test samples (i.e., coverage exceeding that used in  
173 model training) in the Discussion section below.  
174

175 **Does multiple subsampled coverage for model training improved variant calling**  
176 **performance?** Yes. in a comparison of 1:44x|2:64x to '1:44x (single cov.)|2:64x', the latter  
177 used only the full coverage 44-fold in model training; the overall F1-score increased from  
178 95.47% to 96.84% (+1.37%), the SNP from 96.94% to 98.01% (+1.07%), and the indel from  
179 75.78% to 78.44% (+2.86%). The results show that even without sufficient coverage for  
180 model training, using multiple subsampled coverage still improved the variant calling  
181 performance significantly.

182

### 183 **What is the upper bound on performance?**

184 To determine Clair's performance cap using the current ONT data, we intentionally  
185 overfitted Clair by adding the samples we are going to test to the model training. Even  
186 though Clair is designed with multiple generalization techniques, including 'dropout' and 'L2  
187 regularization', exposing the test samples to model training is a biased evaluation, and if a  
188 true variant is not called even after this biased training, this suggests the input signal is  
189 simply too weak. The two tests we did were 1:168x+2:64x|2:64x and 1:168x+2:64x|1:168x.  
190 Although the test sample coverage in the first test was much lower than that in the second  
191 (64-fold against 168-fold), their performance was similar, with the overall F1-score at  
192 97.77% and 97.82%, SNP at 98.75% and 98.77%, and indel at 79.92% and 81.37%. The  
193 biased test 1:168x+2:64x|2:64x did not significantly outperform 1:168x|2:64x; the overall  
194 F1-score increased from 97.40% to 97.77% (+0.33%), SNP from 98.53% to 98.75% (+0.22%),  
195 and indel from 77.34% to 79.92% (+2.58%). Even with this biased experiment, we observed  
196 that the performance of using Clair on the current ONT data was capped at about 97.8% F1-  
197 score overall, 98.8% on SNPs, and 80% on indels. We consider how the new ONT chemistry  
198 that provides a lower base error rate can raise the upper bound of Clair's variant calling  
199 performance in the Discussion section below.

200

201 We analyzed and categorized the FP and FN results of Clair on ONT data. We randomly  
202 extracted 100 FPs and 100 FNs from the 1:168x|2:64x experiment. **Figure 3** shows a  
203 summary and examples of different categories, and Supplementary Table 2 shows a detailed  
204 analysis of each FP and FN. Within the 100 FPs, the three largest categories are "Incorrect  
205 allele with AF $\geq$ 0.2" (41/100), "Homopolymer" (25/100), and "Tandem repeat" (11/100).  
206 "Incorrect allele with AF $\geq$ 0.2" means that at the FP variant, an incorrect allele dominates  
207 other alleles in the read alignments (including the correct one), and the incorrect allele has a  
208 frequency  $\geq$ 20%. "Homopolymer", "Tandem repeat", and "Low complexity region" mean  
209 that the FP variant is in a repetitive region, which remains difficult for ONT base-calling. It is  
210 worth mentioning that these repetitive regions are  $\leq$ 10bp because we removed all GA4GH  
211 low-complexity regions longer than 10bp from benchmarking. It may not be possible to  
212 perfectly resolve these three categories for FP variants using pileup data for variant calling,  
213 although complete read alignments might help to provide better precision. Three out of 100  
214 FPs had "Incorrect insertion bases", while two out of 100 were categorized as "Overlapping  
215 insertions", which means that the alleles of two consecutive insertions overlapped each  
216 other in an input tensor; thus, the correct allele cannot be resolved for both insertions.  
217 These two categories of errors can be resolved using the '--pysam\_for\_all\_indel' option in  
218 Clair, but this slows down Clair for ONT data by a factor of up to ten times. Other errors,  
219 including "Incorrect indel length" and "Incorrect zygoty", are errors made by Clair's neural  
220 network. In the 100 FNs, the three major categories are "Correct allele with AF $<$ 0.25"  
221 (54/100), "Homopolymer" (18/100), and "Tandem repeat" (7/100). "Correct allele with  
222 AF $<$ 0.25" means that at the location of the missed (FN) variant, the signal of the correct  
223 allele is rather weak, with allele frequency lower than 25%. One FN categorized as "More  
224 than two possible alternative alleles" is an error due to an alignment error in segmental  
225 duplications, in which more than two alternative alleles seem correct.

226

## 227 Performance on PacBio CCS

228 In early 2019<sup>17</sup>, PacBio developed a protocol based on single-molecule, circular consensus  
229 sequencing (CCS) to generate highly accurate (99.8%) long reads averaging as much as  
230 13.5kb. PacBio published CCS datasets for HG001 (in this section also referred to as 1:30x; 1  
231 as the sample suffix and 30x means 30-fold coverage), HG002 (2:28x) and HG005 (5:33x),  
232 with HG002 sequenced earlier than HG001 and HG005. The links to the datasets are  
233 available in the Supplementary Notes. We used HG001 and HG005 only for model training  
234 and benchmarking because we found that when DeepVariant was run on all datasets, its  
235 performance on indel calling in the HG002 dataset was substantially lower compared to  
236 HG001 and HG005 (Supplementary Table 3).

237

238 Supplementary Table 4 shows the results of Clair and three other variant callers:  
239 Clairvoyante, Longshot, and DeepVariant. DeepVariant performed the best, with an overall  
240 F1-score of 99.92%, SNP of 99.93%, and indel of 99.78%. The primary result of Clair  
241 1:30x|5:33x had an overall F1-score of 99.80%, which was 0.12% lower than DeepVariant,  
242 but outperformed both Clairvoyante and Longshot. On SNP, 1:30x|5:33x had an F1-score of  
243 99.86%, which was 0.07% lower than DeepVariant, 0.4% higher than Longshot, and 0.18%  
244 higher than Clairvoyante. On indel, 1:30x|5:33x had an F1-score at 98.78%, which was 1%  
245 lower than DeepVariant, but 16% higher than Clairvoyante, showing that the new methods  
246 applied to Clair have effectively solved the indel-calling problem in Clairvoyante. In terms of  
247 speed, Clair (139 minutes) is slightly faster than Longshot (208 minutes), and about seven  
248 times faster than DeepVariant (1,113 minutes). The biased test 1:30x+5:33x|5:33x found  
249 the performance cap of Clair at 99.87% on SNP, which was 0.01% higher than 1:30x|5:33x,  
250 and 99.23% on Indel, which was 0.45% higher than 1:30x|5:33x. While in 1:30x|5:33x, the  
251 coverage used for model training was only 30x, we expect to fill the performance gap on  
252 indel calling by using higher coverage for model training. The performance gap between  
253 Clair and DeepVariant (99.23% against 99.78%, -0.55%) is the result of Clair using pileup  
254 data, while DeepVariant uses complete read alignments that contain information at a per-  
255 read level. This is also a reason DeepVariant runs slower than Clair. We discuss the  
256 possibility of improving Clair to use complete read alignments without slowing down  
257 performance in the Discussion section below.

258

## 259 Performance on Illumina

260 Approximately 300x coverage in 148-bp Illumina paired-end read data is available for five  
261 GIAB samples, including HG001, HG002, HG003, HG004 and HG005<sup>11</sup>. We used HG001,  
262 HG003, HG004, HG005 for model training, and HG002 for benchmarking. To resemble the  
263 typical coverage in whole genome sequencing, we used full coverage of HG001 (306-fold)  
264 and HG005 (352-fold), but down-sampled HG002, HG003 and HG004 to 52-, 57-, and 66-  
265 fold. The links to the datasets are available in the Supplementary Notes.

266

267 Supplementary Table 5 shows the results of Clair and DeepVariant. DeepVariant performed  
268 better, with an overall F1-score of 99.94%. The primary result of Clair  
269 1:306x+3:57x+4:66x+5:352x|2:52x was an overall F1-score of 99.83%, which was 0.11%  
270 lower than DeepVariant's. For SNPs, the F1-score of Clair was 0.09% lower than that of  
271 DeepVariant (99.85% versus 99.94%). For Indel, the F1-score of Clair was 0.4% lower than  
272 DeepVariant's (99.48% versus 99.90%). In terms of speed, Clair was about seven times faster  
273 than DeepVariant (77 versus 537 minutes). The biased test

274 1:306x+2:52x+3:57x+4:66x+5:352x|2:52x found the performance cap of Clair to be 99.90%  
275 for SNPs, which was 0.05% higher than the primary result, but 0.04% lower than that of  
276 DeepVariant, and 99.57% for indels, which was 0.09% higher than the primary result, but  
277 0.31% lower than that of DeepVariant. Similar to the ONT and PacBio CCS experiments, we  
278 expect to fill in the performance gap through partially making use of complete read  
279 alignments, as discussed in the Discussion section.

## 280 Discussion

281 In this paper we present Clair, a germline small variant caller for single molecule sequencing  
282 data. The name Clair means 'clear' in French, echoing its predecessor, named Clairvoyante,  
283 meaning 'clear seeing'. Clair adds new methods to solve problems that Clairvoyante had  
284 trouble with, including multiallelic variant calling and long indel calling. In our experiments  
285 on ONT data, Clair outperformed all existing tools in terms of precision, recall and speed. On  
286 PacBio CCS and Illumina data, Clair performed slightly worse than DeepVariant, but ran  
287 about an order of magnitude faster. Looking closer at the FP and FN variants shows that  
288 Clair is approaching the limit on how accurately it can call variants using pileup data. Some  
289 of the erroneous variant calls can be corrected using complete read alignments instead of  
290 pileup data. However, dealing with complete read alignments requires a more powerful  
291 neural network design with much greater computational demands. In the future, we will  
292 explore using an ensemble method to handle the majority of the variants using Clair, while  
293 for the extremely tricky ones we will use a new, more sophisticated method.

294  
295 The quality and sufficiency of training data is key to the performance of Clair, as well as  
296 other deep learning based variant callers, such as DeepVariant. To train a model for  
297 production purposes, we used five samples (HG001 to 5) for Illumina data, but only two  
298 samples (HG001 and HG002) for ONT, due to the limited availability of public high-coverage  
299 whole genome sequencing datasets for the GIAB samples. ONT sequencing of the other  
300 GIAB samples is ongoing, and more data will be available in the near future. With additional  
301 datasets, we expect to see even higher performance in Clair on ONT data.

302  
303 On ONT data, although Clair performed the best, its indel calling precision and recall were  
304 only about 80%, even excluding GA4GH low-complexity regions, which leaves substantial  
305 room for improvement. While the precision can be further improved by considering  
306 complete read alignments, the recall is bounded by input and can be improved only with a  
307 lower read-level base-calling error rate. Future improvements in ONT technology offer the  
308 possibility of reducing the error rate to 2-3%, which in turn should improve Clair's ability to  
309 detect indels in these data.

310  
311 The GIAB datasets we used for model training have moderate whole-genome sequencing  
312 coverage. Although we can use samples with very high coverage (over 300-fold, which is  
313 sometimes seen in amplicon sequenced data) with Clair for variant calling, such samples  
314 might show degraded performance because very high coverage variants were not  
315 adequately observed in model training. To solve this problem, we propose two methods.  
316 One method is to do transfer learning using a trained model on additional datasets with  
317 very high coverage. Clair supports transfer learning and can be applied to additional  
318 datasets instantly. Another method is an ensemble method, which generates multiple  
319 copies of randomly subsampled read alignments at a candidate variant for Clair to call

320 variant. A majority vote or a decision tree can be used to make the final decision, using the  
321 results of each copy.

322

323 A limitation of Clair is that it cannot be applied to polyploid species, which are inconsistent  
324 with its neural network design. For the same reasons, Clair is not applicable to somatic  
325 variant calling, where a single sample might hold multiple distinct populations of cells. Our  
326 next steps include extending Clair to support polyploid species and somatic variant calling.

## 327 Method

328

### 329 Clair's input/output

#### 330 Input

331 For a truth variant for training or a candidate variant for calling, the read alignments that  
332 overlap or are adjacent to the variant are summarized (i.e. pile-up data) into a three-  
333 dimensional tensor of shape 33 by 8 by 4, comprising 1056 integer numbers. The three  
334 dimensions correspond to the position, the count of four possible bases from two different  
335 strands, and four different ways of counting. In the first dimension, 33 positions include the  
336 starting position of a variant at the center and 16 flanking bases on both sides. The second  
337 dimension corresponds to the count of 'A+', 'A-', 'C+', 'C-', 'G+', 'G-', 'T+' or 'T-', with the  
338 symbols +/- denoting the count from the forward/reverse strand. The third dimension  
339 replicates the first two dimensions with four different ways of counting to highlight 1) the  
340 allelic count of the reference allele, 2) insertions, 3) deletions and 4) single nucleotide  
341 alternative alleles. "Supplementary Note – Pseudocode for generating the input tensor"  
342 shows the pseudo code of the exact algorithm of how the input tensor is generated.  
343 Supplementary Figure 1 demonstrates how the tensors are look like for ONT data at a  
344 random 'non-variant', a 'SNP', an 'Insertion', and a 'Deletion'.

345

#### 346 Output

347 The output of Clair has four tasks (a.k.a. four output components, in total 90 probabilities),  
348 including 1) the 21-genotype probabilistic model (21 probabilities); 2) zygosity (3  
349 probabilities); 3) the length of the first indel allele (33 probabilities); and 4) the length of the  
350 second indel allele (33 probabilities). One of the breakthroughs in Clair is the invention of  
351 the 21-genotype probabilistic model. It comprises all of the possible genotypes of a diploid  
352 sample at a genome position, including 'AA', 'AC', 'AG', 'AT', 'CC', 'CG', 'CT', 'GG', 'GT', 'TT',  
353 'AI', 'CI', 'GI', 'TI', 'AD', 'CD', 'GD', 'TD', 'II', 'DD', and 'ID', where 'A', 'C', 'G', 'T', 'I' (insertion)  
354 and 'D' (deletion) denote the six possible alleles. The new model covers variants with two  
355 alternative alleles, which could not be called in Clairvoyante. The zygosity task outputs the  
356 probability of the input being 1) a homozygous reference (0/0); 2) heterozygous with 1 or 2  
357 alternative alleles (0/1 or 1/2); or 3) a homozygous variant (1/1). The zygosity task is  
358 partially redundant to the 21-genotype task, but it makes decisions independently, and it  
359 crosschecks the decision made by the 21-genotype task. Tasks three and four have the same  
360 design. They output the length of up to two indel alleles. Each task outputs 33 probabilities,  
361 including the likelihood of 1) more than 15bp deleted (<-15bp); 2) any number between -  
362 15bp and 15bp, including 0bp, and; 3) more than 15bp inserted (>15bp). In training, the  
363 indel allele with a smaller number is set as the first indel allele. For example, for a  
364 heterozygous 1bp deletion, the first indel allele is set as -1bp, the second as 0bp (-1bp/0bp).  
365 For a heterozygous 1bp insertion, 0bp/1bp is set. This design makes the non-0bp training



366 variants for both tasks balanced. For a heterozygous indel with two alternative alleles, say,  
367 one -2bp and one 5bp, -2bp/5bp are set. For a homozygous indel, two indel alleles are set to  
368 the same value. For indels longer than 15bp, the exact length is determined using an  
369 additional step (Supplementary Note – New methods used in Clair – Dealing with indels  
370 longer than 15bp). The output of the two indel allele tasks are also used for crosschecking  
371 with the 21-genotype task, with 0bp supporting an SNP allele, and non-0bp supporting an  
372 indel allele. More details about how the four tasks crosscheck each other to come up with a  
373 result coherently are in "Method – New methods used in Clair – Determining the most  
374 probable variant type using the four tasks of Clair".

375

### 376 [New methods used in Clair](#)

377 Clair has been fully revamped while a few basic deep-learning techniques in Clairvoyante  
378 have been retained, including 1) model initialization; 2) activation function; 3) optimizer; 4)  
379 dropout; 5) regularization; and 6) combining multiple samples for model training. Below we  
380 discussed the new methods we have applied in Clair.

381

### 382 [Dealing with indels longer than 15bp](#)

383 For each candidate variant, Clair directly outputs the length of up to two alternative indel  
384 alleles. However, if an insertion goes beyond 15bp, or a deletion goes below -15bp, Clair  
385 runs an additional step to decide its exact length and allele. In the additional step, Clair  
386 gathers all possible insertion/deletion alleles longer than 15bp at a genome position  
387 through pysam (a wrapper around htlib and the samtools<sup>20</sup> package). Depending on the  
388 genotype concluded by Clair, we choose 1) the insertion/deletion with the highest allelic  
389 count for 'AI', 'CI', 'GI', 'TI', 'AD', 'CD', 'GD' and 'TD'; 2) the insertions with the highest and/or  
390 the second-highest allelic count for 'II'; 3) the deletions with highest and/or the second-  
391 highest allelic count for 'DD', or; 4) both the insertion and deletion with the highest allelic  
392 count for 'ID'. The additional step is slow, but it is required only for indels longer than 15bp.  
393 We investigated HG001 and found 570,367 indels in its truth variant set; only 10,672  
394 (1.87%) were >15bp. In our experiments, we found the slowdown was acceptable. Users can  
395 set an option in Clair to enable this additional step for all indels, but our experiments found  
396 that while the improvement in precision is small, it slows down Clair by about two times  
397 with Illumina and PacBio CCS data, and by more than 10 times on ONT data.

398

### 399 [Determining the most probable variant type using the four Clair tasks](#)

400 Clair outputs data on four tasks. With an independent penultimate layer (Figure 1, FC5  
401 layer) immediately before each task, the output of each task is considered independent. We  
402 made two observations from our experiments: 1) for true positive variants, a random task  
403 or two will make a mistake occasionally, but usually, the best and the second-best  
404 probabilities are near and can be disambiguated if considered with other tasks; 2) for false  
405 positive variants, the tasks do not usually agree well with each other, leading to two or  
406 more possible decisions with similar probabilities. Thus, in Clair, we implemented a method  
407 as a submodule for making a decision using the output of all four tasks. Variants are divided  
408 into 10 categories: 1) a homozygous reference allele; 2) a homozygous 1 SNP allele; 3) a  
409 heterozygous 1 SNP allele, or heterozygous 2 SNP alleles; 4) a homozygous 1 insertion allele;  
410 5) a heterozygous 1 insertion allele, or heterozygous 1 SNP and 1 insertion alleles; 6)  
411 heterozygous 2 insertion alleles; 7) a homozygous 1 deletion allele; 8) a heterozygous 1  
412 deletion allele, or heterozygous 1 SNP and 1 deletion alleles; 9) heterozygous 2 deletion

413 alleles; and 10) a heterozygous 1 insertion and 1 deletion alleles. The likelihood value of the  
414 10 categories is calculated for each candidate variant, and the category with the largest  
415 likelihood value is chosen (Pseudocode in "Supplementary Note – Pseudo code for  
416 determining the most probable variant type"). The variant quality is calculated as the square  
417 of the Phred score of the distance between the largest and the second-largest likelihood  
418 values.

419

#### 420 Cyclical learning rate

421 The "initial learning rate" and "how the learning rate decays" are two critical  
422 hyperparameters in training a deep neural network model. A model might be stuck at a local  
423 optimum (i.e. unable to achieve the best precision and recall) if the initial learning rate is  
424 too large, or the decay is too fast. But a large initial learning rate, and a slow decay rate  
425 make the training process either unstable or take too long to finish. So in common practice,  
426 a tediously long grid search that is very costly is needed to find the best hyperparameters.  
427 Furthermore, through a grid search, we found that different sequencing technologies differ  
428 in their best hyperparameters. This problem makes model training too complicated and  
429 largely impedes Clair from being applied to new datasets and sequencing technologies. To  
430 solve the problem, we implemented Cyclical Learning Rate (CLR)<sup>21</sup> in Clair. CLR is a new deep  
431 learning technique that eliminates the need to find the best values of the two  
432 hyperparameters. CLR gives a way to schedule the learning rate in an efficient way during  
433 training, by cyclically varying between a lower and higher threshold. Following the CLR  
434 paper, we determined the higher threshold to be 0.03 and the lower threshold to be 0.0001.  
435 The two thresholds worked well on the training variants of all three sequencing  
436 technologies (Illumina, PacBio CCS and ONT). In terms of which CLR scheduler to use, we  
437 chose the triangular schedule with exponential decay. In our experiments, on PacBio CCS  
438 and Illumina datasets, CLR decreased model training time by about 1–3 times, while often  
439 outperforming the three-step decay method introduced in Clairvoyante for both precision  
440 and recall. However, on ONT datasets, CLR has a lower, but almost negligible, performance  
441 than the three-step decay. We provide both CLR and three-step decay options in Clair. To  
442 train a model for production, we suggest users try both options and choose the best  
443 through benchmarking. In our results, we used CLR for PacBio CCS and Illumina datasets,  
444 and the three-step decay method for ONT datasets.

445

#### 446 Focal loss

447 Our training data uses the truth variants from the GIAB consortium and is unbalanced in  
448 terms of variant type. For example, the number of heterozygous variants is nearly twice that  
449 of the homozygous variants. SNPs are about five times more numerous than indels. Worst  
450 of all, only ~1.1% (39,898 of 3,619,471 in HG001) of variants have two or more alternative  
451 alleles. And among them, only 884 (~0.024%) are multiallelic SNPs. This problem leads to  
452 degenerate models, as the numerous easy variants contribute no useful learning signals and  
453 overwhelm training. In our practice, if we leave the problem unaddressed, we observe a  
454 significant drop in recall for the underrepresented variant types. For multiallelic SNPs, the  
455 recall dropped to zero. To solve this problem, we used the "Focal loss" technique<sup>22</sup>, which  
456 applies a modulating term to the cross-entropy loss in Clair's output to focus training on  
457 underrepresented hard variants and down-weight the numerous easy variants. Focal loss  
458 calculates the loss as  $(1 - p_t)^\gamma \times \alpha_t \times -\log(p_t)$ , where  $p_t = p$ ,  $\alpha_t = \alpha$ , if the prediction  
459 matches the truth, or  $p_t = (1 - p)$ ,  $\alpha_t = (1 - \alpha)$  otherwise. In addition to the traditional

460 cross entropy loss, focal loss uses two more parameters:  $\gamma$  (the focusing parameter) to  
461 differentiate easy/hard training examples, and  $\alpha$  (the balancing parameter) to balance the  
462 importance of positive/negative training examples. We determined  $\gamma = 2$  and  $\alpha = 0.25$   
463 work best for the GIAB truth variants with a 1:2 ratio of truth variant and non-variant. The  
464 use of focal loss significantly increases the performance of underrepresented variant types.  
465 It also allows us to be more lenient on variant type balance when augmenting the training  
466 data.

467

#### 468 [Training data augmentation using subsampled coverage](#)

469 Lower coverage usually leads to lower precision and recall in variant calling. To train Clair to  
470 achieve better performance on variants with lower coverages, we subsampled each dataset  
471 into four or nine additional datasets with lower coverages. The subsampling factors  $f$  are  
472 determined as  $(\sqrt[h]{4 \div c})^n$ , where  $c$  is full coverage of each sample, 4 is the minimal  
473 coverage,  $h$  is either 4 or 9, and  $n$  is from 1 to  $h$ . Using HG002 as an example, its full  
474 coverage is 63.68-fold, and the nine subsampled coverages are 46.82-, 34.43-, 25.31-,  
475 18.61-, 13.69-, 10.06-, 7.40-, 5.44- and 4.00-fold. If variant samples were lower than 4x after  
476 subsampling, we removed them from training. We used the command "samtools view -s  $f$ "  
477 to generate a subsampled BAM. A different seed counting from zero for random number  
478 generation was set for each coverage. The use of subsampled coverages improved the recall  
479 on indel significantly.

480

#### 481 [Methods tested but showed no improvement to accuracy](#)

482 In this section we discuss methods we tested that had no effect on Clair's performance. For  
483 researchers working on further improving the performance of Clair, these methods could be  
484 avoided or revised.

485

#### 486 [Extend input tensor from 33bp to 49bp and 65bp](#)

487 Intuitively, a larger input tensor with more flanking bases provides additional information  
488 on the surrounding read alignments, which might lead to better precision and recall. Our  
489 experiments show that extending the input tensor from 33bp (16bp flanking bases) to 49bp  
490 (24bp flanking bases) and 65bp (32bp flanking bases) slows down Clair by 5.4% and 12.6%,  
491 respectively. But the improvement was negligible in terms of precision or recall with both  
492 SNP and indel.

493

#### 494 [Using non-variants adjacent to true variants as negative samples for model training](#)

495 Clair, by default, uses a ratio of 1:2 on true variants and non-variants for model training, and  
496 the non-variants are randomly selected from the genome, except for the positions with a  
497 true variant or insufficient coverage. We experimented using non-variants adjacent to true  
498 variants (we tried  $\pm 2$ bp,  $\pm 8$ bp and  $\pm 16$ bp) as negative samples for model training and  
499 adjusted the ratio to 1:1:1 on true variants adjacent non-variants and random non-variants.  
500 We used adjacent non-variants for training because their input is true variant alike, but a  
501 few bases shifted. The hypothesis was that using them as adversarial training samples  
502 against the true variants might improve Clair's performance at high density variants and  
503 alignment errors. However, our experiments show that the method decreased recall slightly  
504 on both SNP and indel.

505

## 506 Incorporating less confident GIAB variants for model training

507 The GIAB HG001 truth variant dataset includes 3,619,471 truth variants passing all criteria  
508 (with the 'PASS' tag), and 2,264,796 variants failing one or more criteria. The criteria details  
509 were explained by Zook et al. in 2019<sup>13</sup>. Among the failed variants, 310,113 had the  
510 'allfilteredbutagree' tag, which means at the same position, the variants called in all the  
511 supporting datasets agreed with each other, even though none of them were in the callable  
512 regions, in which a range of coverage and minimum alignment quality are met. These  
513 variants are considered less confident than those passing all criteria, but might still  
514 contribute to training a better model because while a deep neural network can tolerate  
515 moderate errors in training data, if any new patterns are provided in additional data, it will  
516 be learned by the model and, in turn, improve the performance. We experimented adding  
517 the variants with the 'allfilteredbutagree' tag to training. However, our results show that the  
518 recall went down significantly on SNP, and the precision went down significantly on indel.  
519

## 520 Discarding homopolymer variants in model training

521 Variant calling in homopolymer sequences is usually more challenging, and the problem is  
522 even worse in SMS technologies since the length of homopolymers is usually  
523 underestimated. At longer homopolymers, the signals are usually too discordant, so it is  
524 common for humans to make mistakes with them. From the feature engineering point of  
525 view, variants in homopolymer sequences are confusing and less informative, and might  
526 lead to a degenerate model. We tested model training without variants at homopolymer  
527 sequences longer than 5bp. Our results show that both precision and recall degrade  
528 significantly if homopolymer variants are not used in model training.  
529

## 530 Benchmarking

### 531 The GIAB truth variant datasets

532 We used the GIAB version 3.3.2 datasets as our truth variants. Depending on the availability  
533 of deep sequencing data, our ONT experiments used samples HG001 or HG001+HG002 for  
534 model training, our PacBio CCS experiments used HG001 or HG001+HG005, and our Illumina  
535 experiments used HG001 or HG001+HG003+HG004+HG005. For benchmarking, ONT, PacBio  
536 CCS and Illumina experiments have used HG002, HG005, and HG002, respectively. The links  
537 to the truth variants and high-confidence regions are available in "Methods – Data sources –  
538 Truth variants". Depending on the reference genome used in the already available read  
539 alignments, we used GRCh38 for our ONT and Illumina experiments, and GRCh37 for our  
540 PacBio CCS experiments. The links to the reference genomes we used are available in  
541 "Methods – Data sources – Reference genomes"  
542

### 543 Removing GA4GH low-complexity regions from benchmarking

544 Krusche et al.<sup>6</sup> from the GA4GH benchmarking team and the GIAB consortium published the  
545 low-complexity regions, including homopolymers, STRs, VNTRs, and other repetitive  
546 sequences for stratifying variants in their paper titled "Best practices for benchmarking  
547 germline small-variant calls in human genomes". In the low-complexity regions larger than  
548 10bp, ONT's performance degraded significantly (precision -11.41%, recall -55.33%), while  
549 that of PacBio CCS and Illumina dropped only 0.99–1.67% in precision and recall  
550 (Supplementary Table 6). Thus, when computing variant calling using ONT, we suggest  
551 removing the variants called in the low-complexity regions. In our benchmarks for all  
552 datasets, in addition to using the high-confidence regions of each sample provided by GIAB,

553 we removed the low-complexity regions. The procedures are available in "Supplementary  
554 Note – Commands – Remove GA4GH low complexity regions from GIAB's high-confidence  
555 regions". There was retention of 92.61–93.47% high-confidence regions in GRCh38, and  
556 94.40–95.05% in GRCh37 of the five samples HG001 to 5 after removing the low-complexity  
557 regions (Supplementary Table 7).

558

#### 559 [Benchmarking methods and metrics](#)

560 Clair trains a model either for 30 epochs, using the Cyclical Learning Rate (used for PacBio  
561 CCS and Illumina datasets), or by decaying the learning rate three times (by one tenth each  
562 time) until the validation losses converge (used for ONT datasets). While the performance of  
563 last few epochs are generally similar, the best-performing one will be chosen for  
564 benchmarking. We did not run replications of model training because choosing from the  
565 best epoch actually resembles the process of having multiple replications. In ONT and  
566 Illumina experiments, the GRCh38 reference genome was used, while in PacBio CCS  
567 experiments, GRCh37 was used. For each variant calling experiment, we used the  
568 submodule vcfEval in RTG Tools<sup>23</sup> version 3.9 to generate three metrics, 'Precision', 'Recall',  
569 and 'F1-score', for five categories of variants: 'Overall', 'SNP', 'Indel', 'Insertion', and  
570 'Deletion'. All time consumptions were gauged on two 12-core Intel Xeon Silver 4116 (in  
571 total 24 cores), with 12 concurrent Clair processes, each with 4 Tensorflow threads. As Clair  
572 has some serial steps that use only one thread, we observed our setting sufficient to  
573 maximize the utilization of all 24 cores. For other variant callers, including DeepVariant,  
574 Longshot and Medaka, options were to set to use all 24 cores for the best speed.

575

#### 576 [Computational performance](#)

577 Clair requires Python3, Pypy3 and Tensorflow. Variant calling using Clair requires only a  
578 CPU. For a typical 30-fold human WGS sample, Clair takes about an hour for Illumina data  
579 and PacBio CCS data, and five hours on ONT data, using two 12-core Intel Xeon Silver 4116  
580 processors. Memory consumption depends on both input data and concurrency. ONT data  
581 has a higher memory footprint than Illumina and PacBio CSS, while Clair is capped at 7GB  
582 per process (helper scripts at 4.5GB and Tensorflow at 2.5GB). Model training requires a  
583 high-end GPU; we used the Nvidia Titan RTX 24GB in our experiment. Using Clair's default  
584 parameters, generating 1 million training samples takes about 38 seconds. For example, the  
585 Illumina model with four samples (HG001, 3, 4, 5) and 30 coverages in total (10 for 1 and 5,  
586 5 for 2 and 3) has 284,367,735 training samples and takes about 11,000 seconds per epoch.  
587 In comparison, the Nvidia RTX 2080 Ti 11GB is about 15% slower, and the Nvidia GTX 1080 Ti  
588 11GB is about 35% slower.

589

#### 590 [Code availability](#)

591 Clair is open source, available at <https://github.com/HKU-BAL/Clair>.

592

#### 593 [Data availability](#)

594 The authors declare that all data supporting the findings of this study are available at the  
595 links in the paper and its supplementary information files.

596 **Acknowledgements**

597 We thank Steven Salzberg, Mike Schatz, and Fritz Sedlazeck for their valuable comments. R.  
598 L. was supported by the ECS (Grant No. 27204518) of the HKSAR government, and the URC  
599 fund at HKU. T. L., C. W., Y. W., C. T., C. Li. and C. Le. were supported by the ITF (Grant No.  
600 ITF/331/17FP) from the Innovation and Technology Commission, HKSAR government.

601 **Author contributions**

602 R. L. and T. L. conceived the study. R. L, C. W., Y. W., C. T., C. Li. and C. Le. analyzed the data  
603 and wrote the paper.

604 **Competing interests**

605 The authors declare no competing interests

606

## 607 References

- 608 1 Goodwin, S., McPherson, J. D. & McCombie, W. R. Coming of age: ten years of next-  
609 generation sequencing technologies. *Nat Rev Genet* **17**, 333-351,  
610 doi:10.1038/nrg.2016.49 (2016).
- 611 2 Ashley, E. A. Towards precision medicine. *Nat Rev Genet* **17**, 507-522,  
612 doi:10.1038/nrg.2016.86 (2016).
- 613 3 Li, H. Toward better understanding of artifacts in variant calling from high-coverage  
614 samples. *Bioinformatics* **30**, 2843-2851, doi:10.1093/bioinformatics/btu356 (2014).
- 615 4 Luo, R., Schatz, M. C. & Salzberg, S. L. 16GT: a fast and sensitive variant caller using a  
616 16-genotype probabilistic model. *GigaScience* (2017).
- 617 5 Van der Auwera, G. A. *et al.* From FastQ data to high confidence variant calls: the  
618 Genome Analysis Toolkit best practices pipeline. *Curr Protoc Bioinformatics* **43**, 11 10  
619 11-33, doi:10.1002/0471250953.bi1110s43 (2013).
- 620 6 Krusche, P. *et al.* Best practices for benchmarking germline small-variant calls in  
621 human genomes. *Nat Biotechnol* **37**, 555-560, doi:10.1038/s41587-019-0054-x  
622 (2019).
- 623 7 The long view on sequencing. *Nat Biotechnol* **36**, 287, doi:10.1038/nbt.4125 (2018).
- 624 8 Sedlazeck, F. J., Lee, H., Darby, C. A. & Schatz, M. C. Piercing the dark matter:  
625 bioinformatics of long-range sequencing and mapping. *Nat Rev Genet*,  
626 doi:10.1038/s41576-018-0003-4 (2018).
- 627 9 Ameer, A., Kloosterman, W. P. & Hestand, M. S. Single-Molecule Sequencing:  
628 Towards Clinical Applications. *Trends Biotechnol* **37**, 72-85,  
629 doi:10.1016/j.tibtech.2018.07.013 (2019).
- 630 10 Luo, R., Sedlazeck, F. J., Lam, T. W. & Schatz, M. C. A multi-task convolutional deep  
631 neural network for variant calling in single molecule sequencing. *Nat Commun* **10**,  
632 998, doi:10.1038/s41467-019-09025-z (2019).
- 633 11 Zook, J. M. *et al.* Extensive sequencing of seven human genomes to characterize  
634 benchmark reference materials. *Sci Data* **3**, 160025, doi:10.1038/sdata.2016.25  
635 (2016).
- 636 12 Zook, J. M. *et al.* Integrating human sequence data sets provides a resource of  
637 benchmark SNP and indel genotype calls. *Nat Biotechnol* **32**, 246-251,  
638 doi:10.1038/nbt.2835 (2014).
- 639 13 Zook, J. M. *et al.* An open resource for accurately benchmarking small variant and  
640 reference calls. *Nature Biotechnology* **37**, 561-566, doi:10.1038/s41587-019-0074-6  
641 (2019).
- 642 14 Jain, M. *et al.* Nanopore sequencing and assembly of a human genome with ultra-  
643 long reads. *Nat Biotechnol* **36**, 338-345, doi:10.1038/nbt.4060 (2018).
- 644 15 Edge, P. & Bansal, V. Longshot enables accurate variant calling in diploid genomes  
645 from single-molecule long read sequencing. *Nat Commun* **10**, 4660,  
646 doi:10.1038/s41467-019-12493-y (2019).
- 647 16 *medaka: Sequence correction provided by ONT Research.*  
648 <https://github.com/nanoporetech/medaka>, accessed Nov 17 2019.
- 649 17 Wenger, A. M. *et al.* Accurate circular consensus long-read sequencing improves  
650 variant detection and assembly of a human genome. *Nat Biotechnol* **37**, 1155-1162,  
651 doi:10.1038/s41587-019-0217-9 (2019).
- 652 18 Poplin, R. *et al.* A universal SNP and small-indel variant caller using deep neural  
653 networks. *Nature Biotechnology* **2018/09/24/online**, doi:10.1038/nbt.4235 (2018).

- 654 19 Simpson, J. T. *et al.* Detecting DNA cytosine methylation using nanopore sequencing.  
655 *Nature methods* **14**, 407 (2017).
- 656 20 Li, H. *et al.* The Sequence Alignment/Map format and SAMtools. *Bioinformatics* **25**,  
657 2078-2079, doi:10.1093/bioinformatics/btp352 (2009).
- 658 21 Smith, L. N. in *2017 IEEE Winter Conference on Applications of Computer Vision*  
659 *(WACV)*. 464-472 (IEEE).
- 660 22 Lin, T.-Y., Goyal, P., Girshick, R., He, K. & Dollár, P. in *Proceedings of the IEEE*  
661 *international conference on computer vision*. 2980-2988.
- 662 23 Cleary, J. G. *et al.* Joint variant and de novo mutation identification on pedigrees  
663 from high-throughput sequencing data. *J Comput Biol* **21**, 405-419,  
664 doi:10.1089/cmb.2014.0029 (2014).
- 665



666 Figures

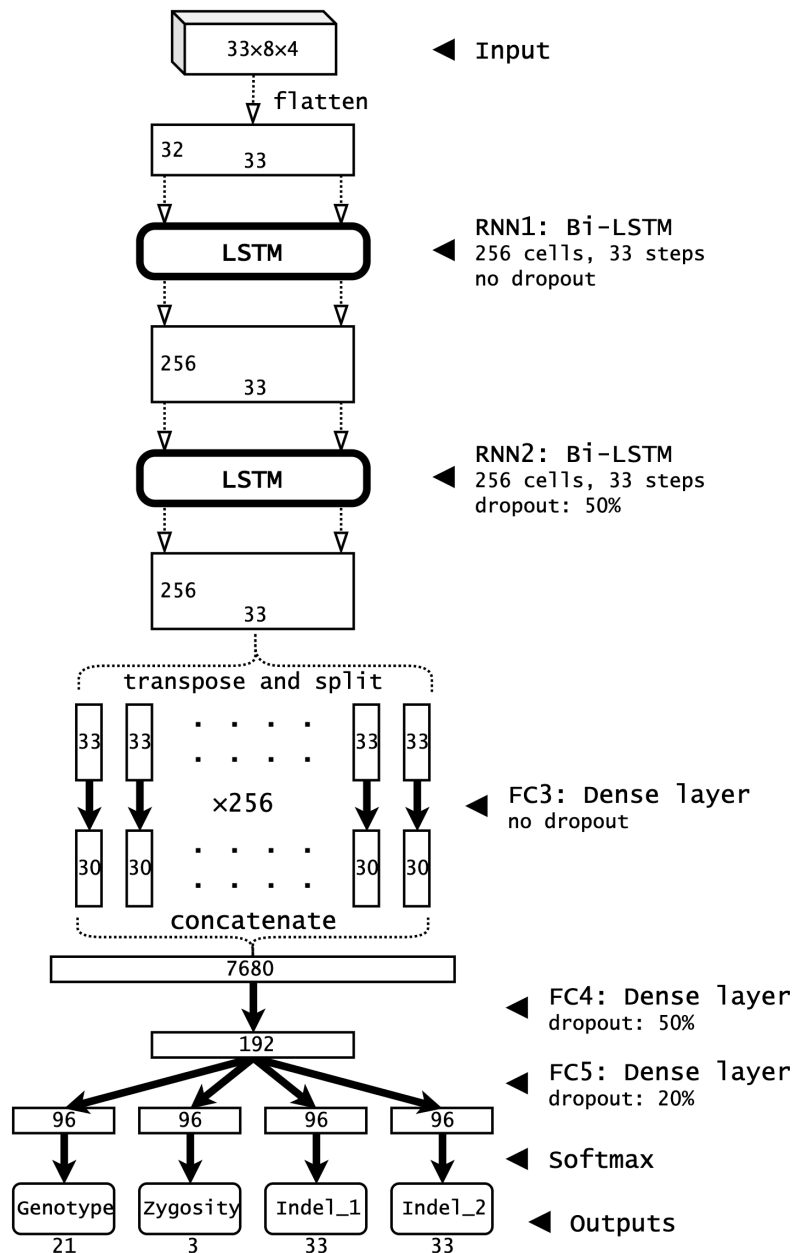

667

668

669

670

Figure 1. Clair network architecture and layer details. RNN: Recurrent Neural Network. FC: Fully Connected layer. Bi-LSTM: Bi-directional Long Short-Term Memory layer.

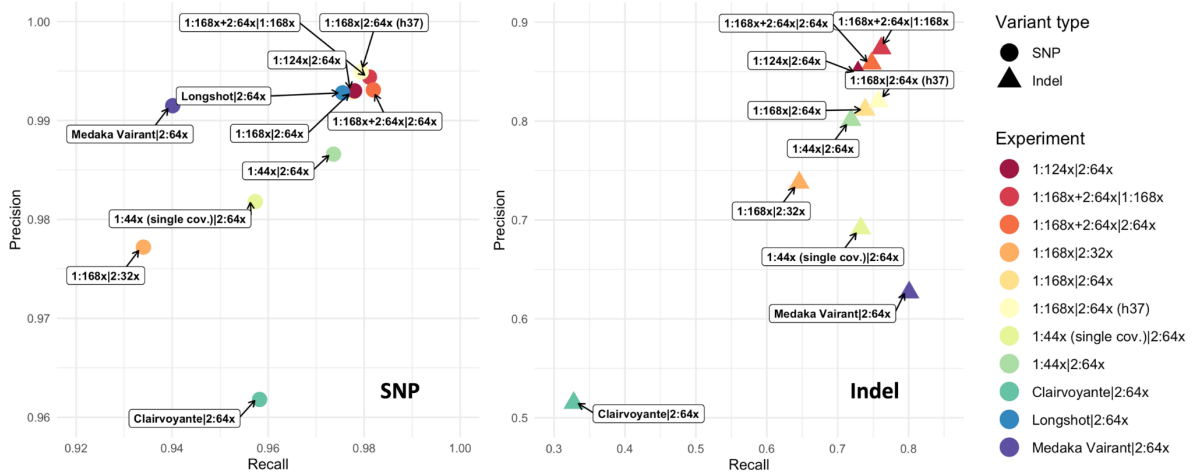

671  
672  
673  
674  
675  
676

Figure 2. ONT benchmarking results. For Clair, the datasets used for model training and testing are separated with a vertical bar '|', and are written as '*a:bx*', where *a* denotes the suffix of the GIAB sample ID (e.g., 1 means HG001), and *b* denotes the coverage of the dataset. Longshot calls only SNP variants, so it is not shown in the indel results.

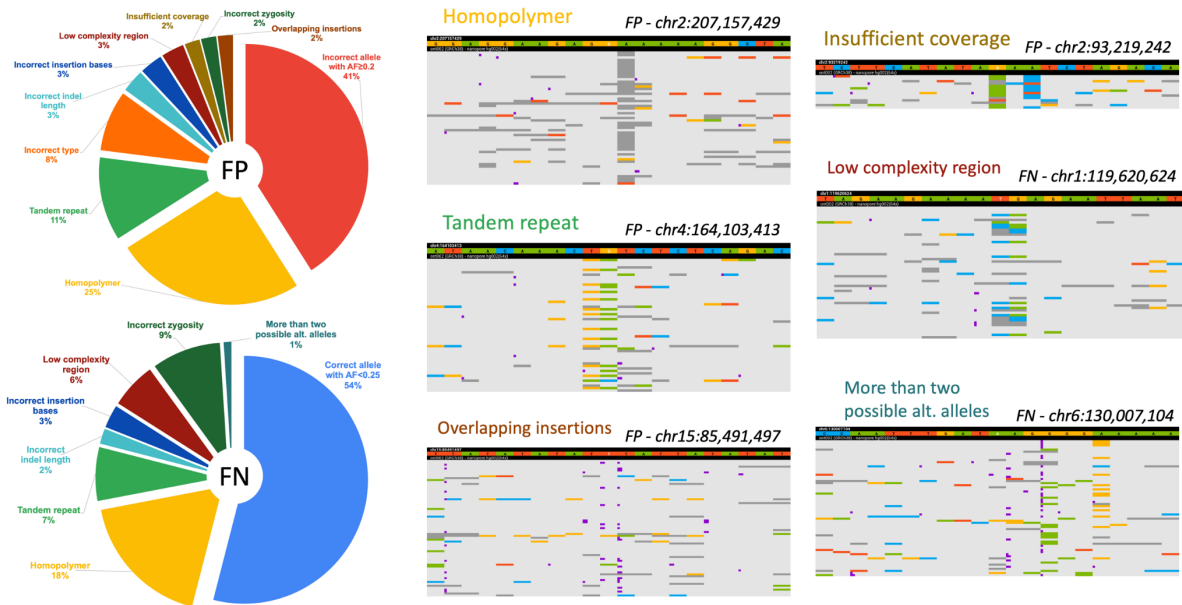

677

678

679

680

681

682

Figure 3. The category distribution of FPs and FNs made by Clair in the 1:168x | 2:64x experiment on ONT data, and six genome browser screen captures showing examples of different categories. In the screen captures, bases A, C, G, and T are green, blue, yellow, and red, respectively. Gaps (i.e., deletions) are dark gray. Insertions are purple dots between two bases and are wider when the insertion is longer.
